# Supplementary material for: Theoretical investigations of 2-vinylpyridine stereoselective polymerization catalyzed by cationic yttrium complexes with different ancillary ligands
Source: Royal Society of Chemistry journal article supplement (doi:10.1039/d4dt00838c), 2024-01-01
Supplement: d4dt00838c1.pdf [file d4dt00838c1.pdf]

# Theoretical Investigations of 2-Vinylpyridine Stereoselective Polymerization Catalyzed by Cationic Yttrium Complexes with Different Ancillary Ligands

Xin Wen,<sup>a</sup> Zhenli Zhang,<sup>d</sup> Kaipai Ren,<sup>a</sup> Wenzhen Zhang,<sup>a</sup> Guangli Zhou,<sup>\*,c</sup> and Yi Luo<sup>\*,a,b</sup>

<sup>a</sup> State Key Laboratory of Fine Chemicals, School of Chemical Engineering, Dalian University of Technology, Dalian 116024, China.

<sup>b</sup> PetroChina Petrochemical Research Institute, Beijing, 102206, China. E-mail: luoyi010@petrochina.com.cn

<sup>c</sup> School of Chemistry and Chemical Engineering, Linyi University, Linyi 276000, China. E-mail: [zhouguangli@lyu.edu.cn](mailto:zhouguangli@lyu.edu.cn).

<sup>d</sup> National Elite Institute of Engineering, CNPC, Beijing 100096, China.

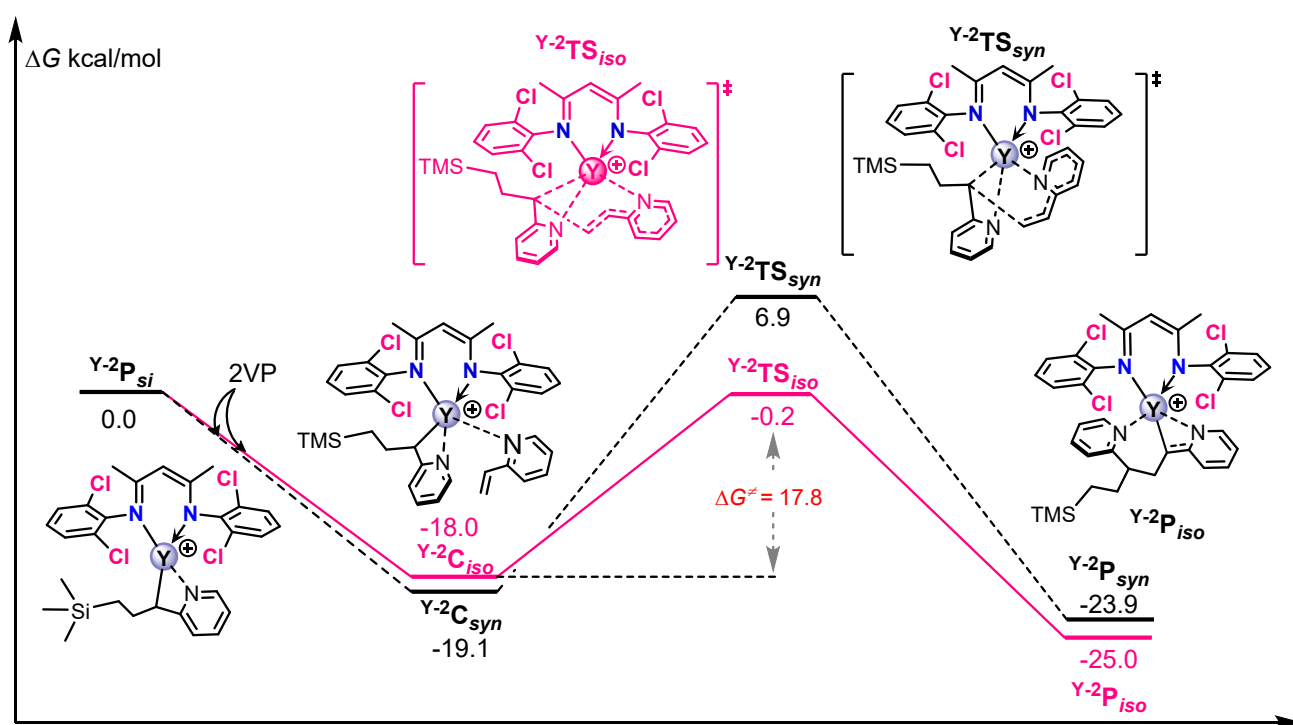

**Figure S1.** Calculated energy profiles for 2VP insertion into Y-2 complex (isotacticity). The isotactic path is in pink and the syndiotactic one is in black (energies in kcal/mol).

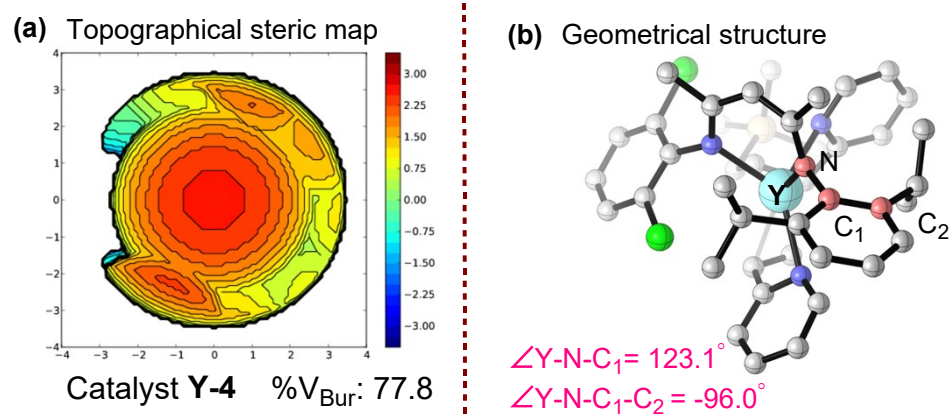

**Figure S2.** (a) Topographical steric maps of catalyst **Y-4** (b) Geometrical structures of  $Y-4TS_{iso}$ .
